# Supplementary material for: Crystal structures and magneto-structural correlation analysis for several cyano-bridged bimetallic complexes based on MnIII–FeIII systems
Source: Royal Society of Chemistry journal article supplement (doi:10.1039/c4nj01157k), 2014-01-01
Supplement: c4nj01157k1.pdf [file c4nj01157k1.pdf]

## Electronic supplementary information

### Crystal Structures and Magneto-Structural Correlation Analysis for Several Cyano-Bridged Bimetallic Complexes Based on $\text{Mn}^{\text{III}}$ - $\text{Fe}^{\text{III}}$ Systems

Hongbo Zhou,<sup>a</sup> Yingying Wang,<sup>a</sup> Fangyou Mou,<sup>a</sup> Xiaoping Shen,<sup>\*a</sup> and Yashu Liu<sup>b</sup>

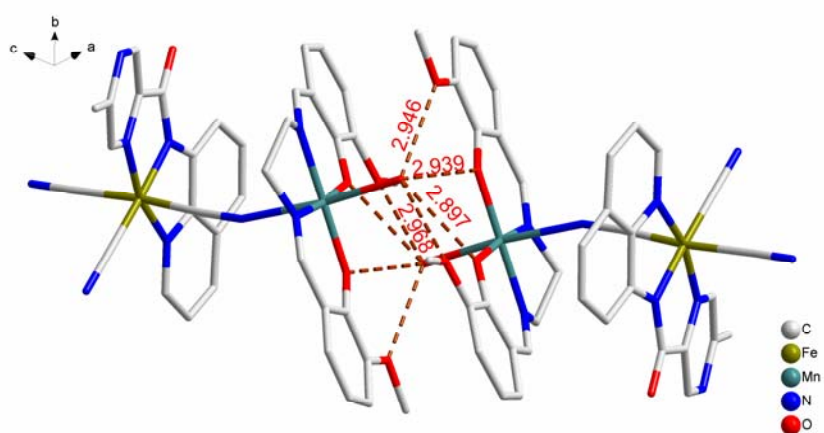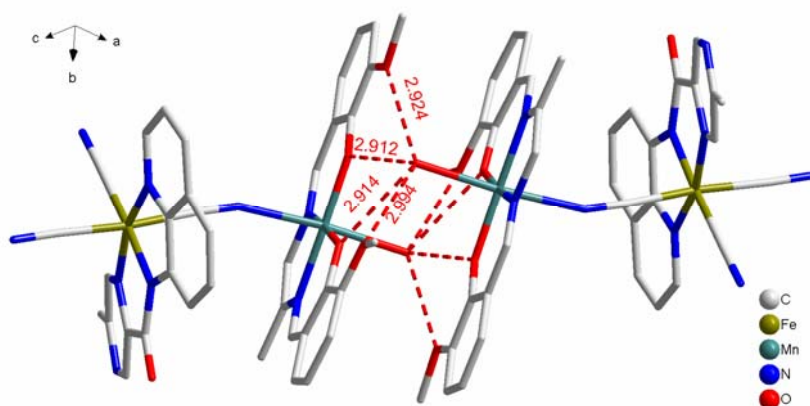

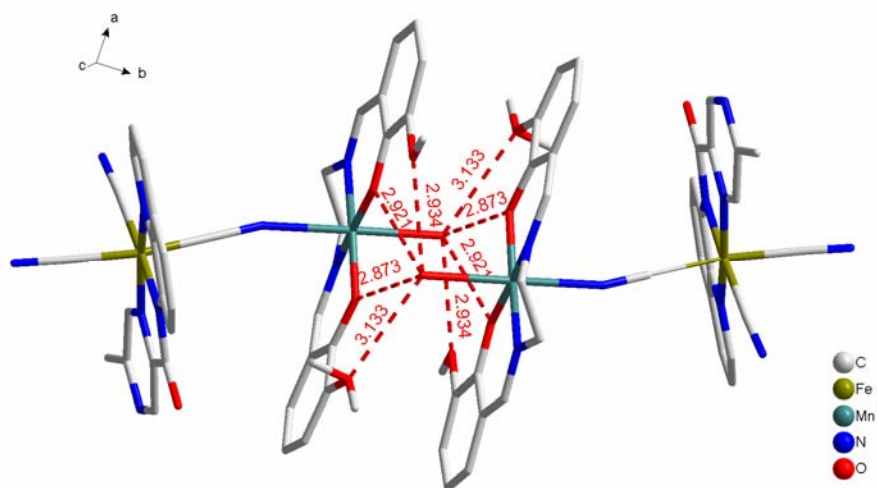

(c)

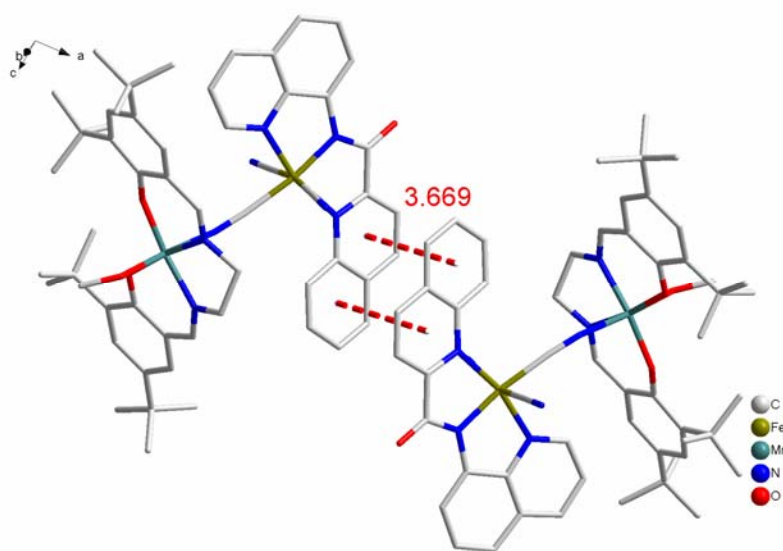

(d)

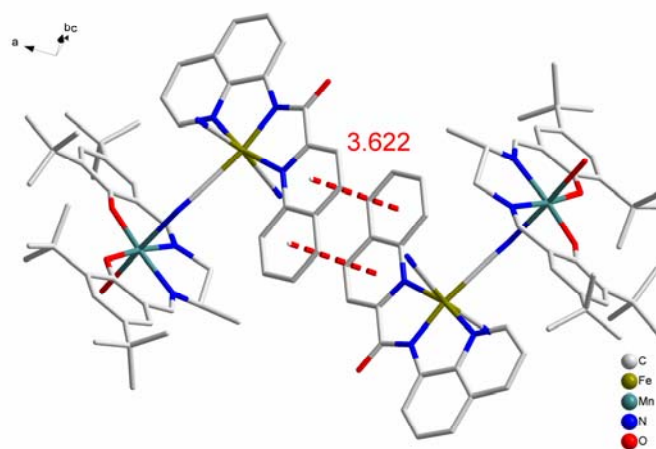

(e)

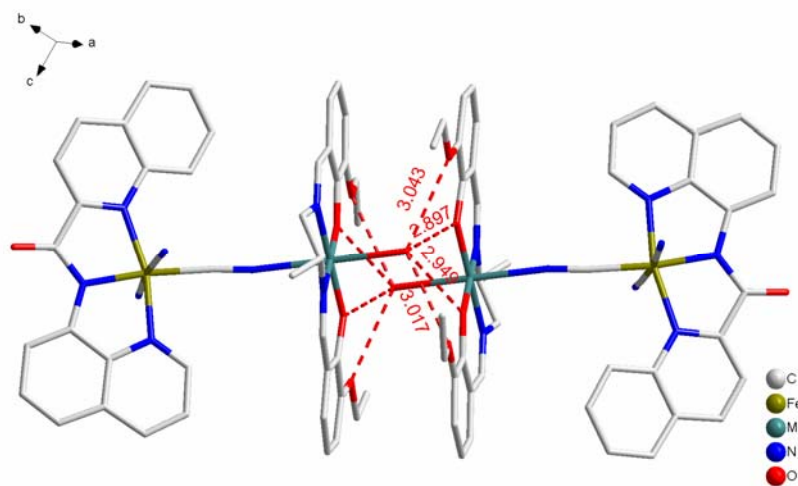

(f)

**Figure S1** The formed supramolecular dimers for complexes **1(a)**, **2(b)**, **3(c)**, **4(d)**, **5(e)** and **6(f)**

(The red dashed lines represent the hydrogen bonds or  $\pi$ - $\pi$  stacking interactions).

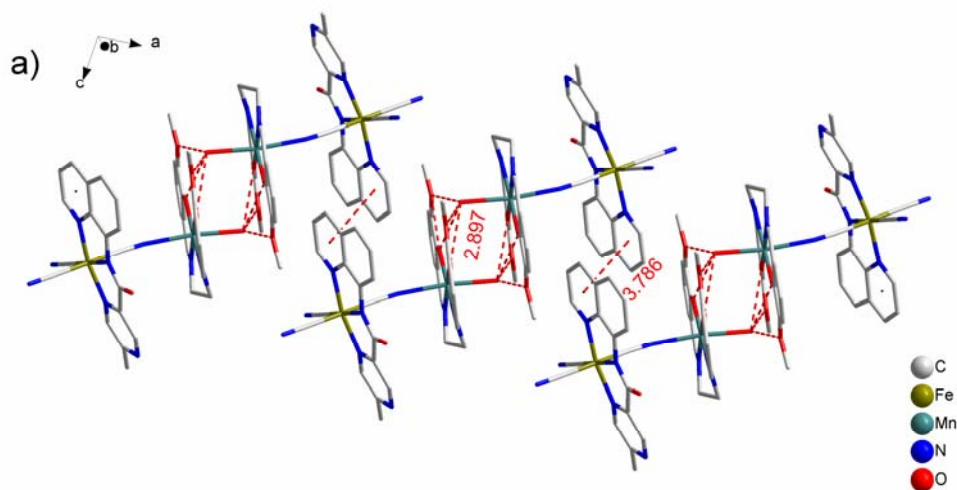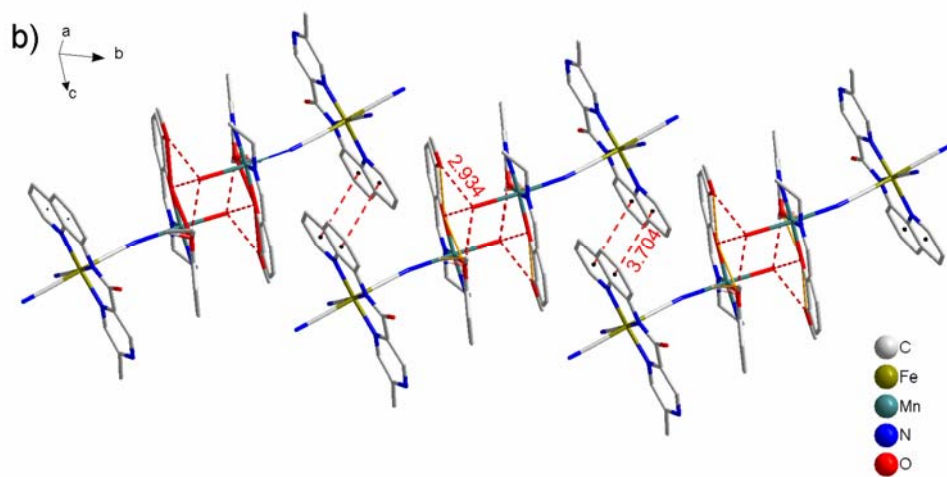

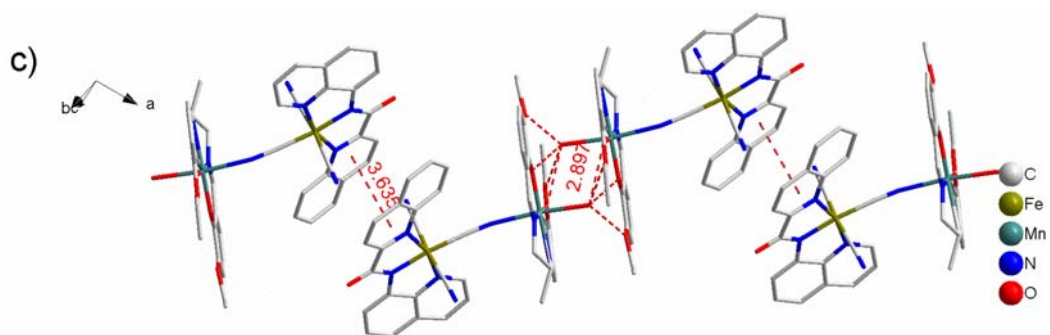

**Figure S2** The formed supramolecular chains for complexes **1(a)**, **3(b)** and **6(c)** (The red dashed lines represent the hydrogen bonds or  $\pi$ - $\pi$  stacking interactions).

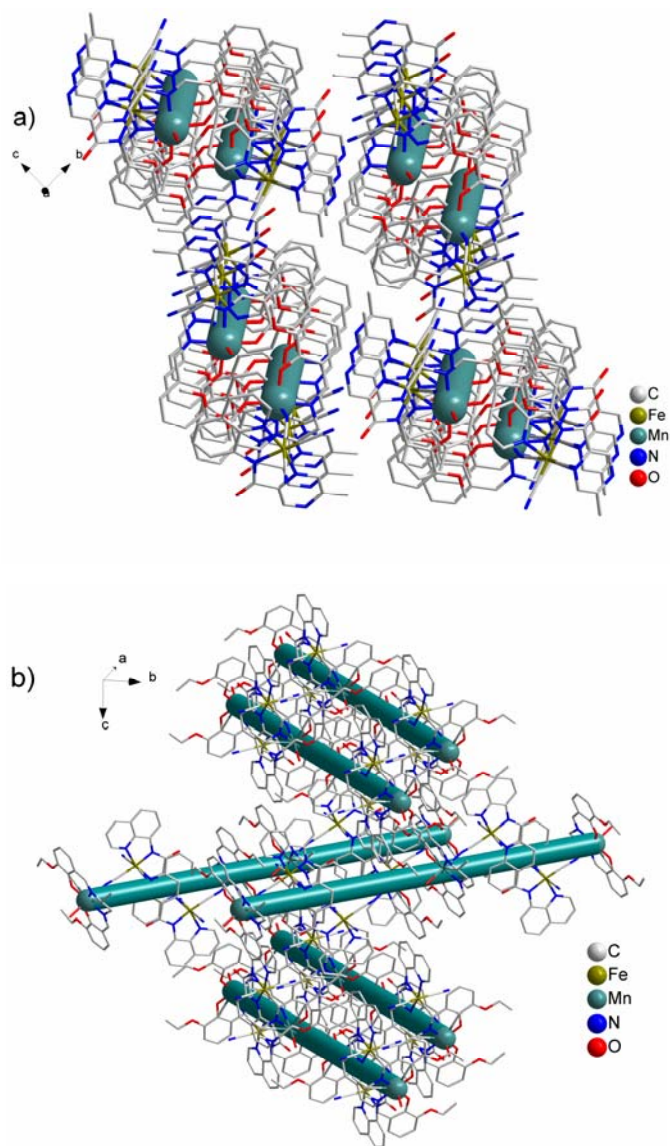

**Figure S3** The different arrangements of packing structures of supramolecular  $\text{Mn}^{\text{III}}\text{Fe}^{\text{III}}$  chains shown by **1(a)** and **6(b)** (the blue bulk columns represents the supramolecular  $\text{Mn}^{\text{III}}\text{Fe}^{\text{III}}$  chains)

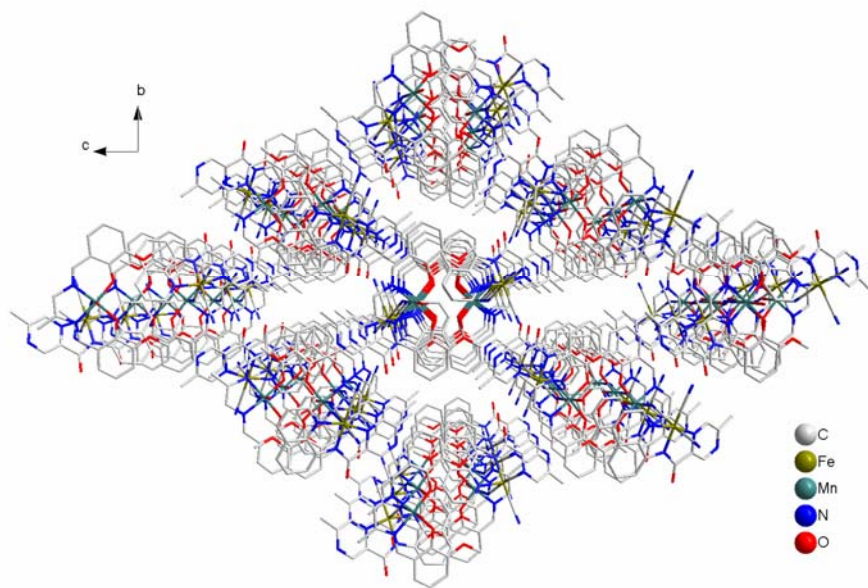

Complex 2

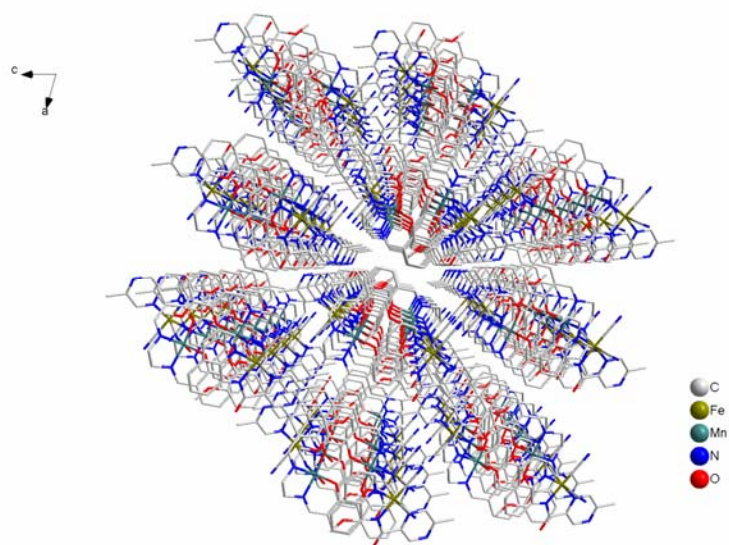

Complex 3



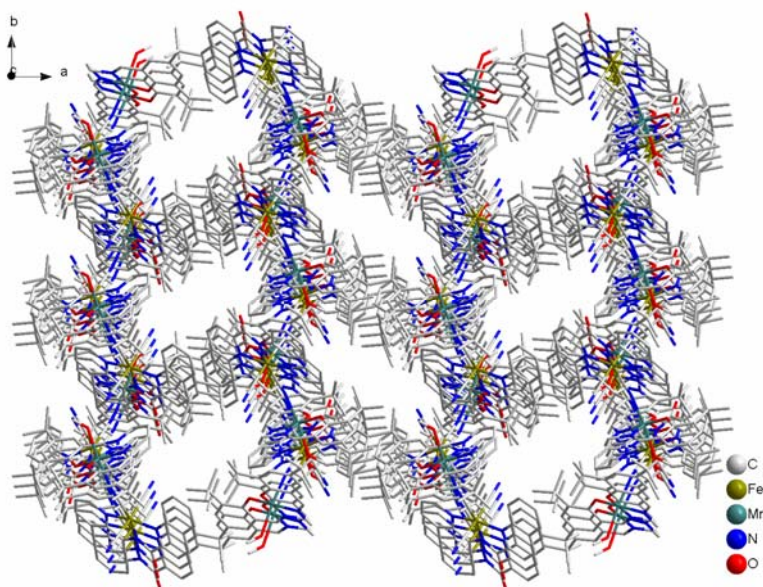

Complex 4

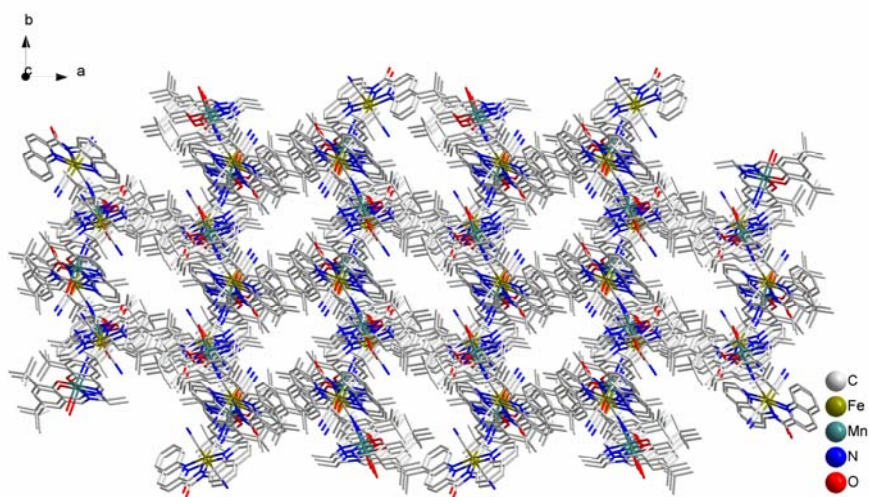

Complex 5

**Figure S4** The packing structure for **2**, **3**, **4** and **5** (Hydrogen atoms and crystallized solvent molecules are omitted for clarity)
